# Supplementary material for: The Association of Preinfection Daily Oral Anticoagulation Use and All-Cause in Hospital Mortality From Novel Coronavirus 2019 at 21 Days: A Retrospective Cohort Study
Source: PubMed Central journal article supplement — Crit Care Explor. 2021 Jan 22;3(1):e0324. doi: 10.1097/CCE.0000000000000324 (PMC7838002; doi:10.1097/cce.0000000000000324), 2021-01-22
Supplement: cc9-3-e0324-s001.pdf [file cc9-3-e0324-s001.pdf]

## Anticoagulant therapy and survival among COVID-19 admitted patients

- Problem statement
  - Is Anticoagulant use effective for reducing mortality among covid19 positive patients who were on anticoagulants prior to in-patient admission compared to patients on no oral anticoagulants?
- Sample
  - 3740 Covid19+ patients who had at least one ED or In-patient visit
- Inclusion + Exclusion
  - Patients under 60 were excluded in order to focus on a higher risk population (1945 excluded. n = 1795)
  - Patients with a positive Covid19 test order date after April 22d were excluded (479 excluded, n = 1316)
  - Patients that had only had an ED visit were excluded due to concerns over information loss regarding mortality (183 excluded. n=1133)
  - One patient was excluded for unknown date of death (n = 1132)
  - Patients not ever placed on oral anticoagulants were put in the Control Group (n=894)
  - Patients with a history of oral anticoagulants had chart review performed (n=238)
  - Of those with a history of oral anticoagulants, 105 were excluded because the oral anticoagulant was started during their COVID admission. (n=133)
  - One patient who was initially in the warfarin group was excluded due to chart review finding that they had not been placed on Coumadin (n=1)
- Treatment Groups
  - Two treatment groups were identified.
    - 28 patients who were only on Warfarin prior to admission
    - 104 patients who were only on DOAC prior to admission
  - 894 patients were identified in the control group

### Sample Characteristics (n = 1026)

| Group         | Mean Age | Median (IQR)      | p val (vs control) |
|---------------|----------|-------------------|--------------------|
| Warfarin Only | 81.6     | 85 (69.5 – 100.5) | 0.01               |
| DOAC Only     | 78.3     | 79 (71.5-86.5)    | 0.02               |
| Control       | 76.1     | 75 (67-85)        | NA                 |

P values calculated via t-test

| Group         | Male n (%)  | Female n (%) | p val (vs control) |
|---------------|-------------|--------------|--------------------|
| Warfarin Only | 13 (46.4%)  | 15 (53.6%)   | 1                  |
| DOAC Only     | 67 (64.4%)  | 37 (35.6%)   | 0.0003             |
| Control       | 407 (45.5%) | 487 (54.5%)  | NA                 |

P values calculated via chi-square test

| Race / Ethnicity | Control group n (%) | Warfarin Only n (%; p-value) | DOAC Only Percent n (%; p-value) |
|------------------|---------------------|------------------------------|----------------------------------|
| White            | 500 (55.9%)         | 18 (64.3%; 0.44)             | 72 (69.2%; 0.01)                 |
| Hispanic         | 145 (16.2%)         | 4 (14.3%; 1)                 | 6 (5.8%; 0.003)                  |
| Black            | 196 (21.9%)         | 6 (21.4%; 1)                 | 21 (20.2%; 0.80)                 |
| Other/Unknown    | 32(3.6%)            | 0 (0.0%; 1)                  | 4 (3.9%; 1)                      |
| Asian            | 17(1.9%)            | 0 (0.0%; 1.)                 | 1 (1.0%; 1)                      |
| Native American  | 1 (0.1%)            | 0 (0.0%; 1)                  | 0 (0.0%; 1)                      |

| Group         | Mean Body Mass Index | Median Body Mass Index | P val (vs control) |
|---------------|----------------------|------------------------|--------------------|
| Warfarin Only | 28.7                 | 27.1                   | 0.64               |
| DOAC only     | 29.3                 | 28.6                   | 0.03               |
| Control       | 28.0                 | 27.0                   | NA                 |

P values calculated via t test

| Comorbid Diagnosis       | Control Group n (%) | Warfarin Only n (%; p-value) | DOAC Only n (%; p-value) |
|--------------------------|---------------------|------------------------------|--------------------------|
| Coronary Artery Disease  | 172 (19.2%)         | 12 (42.9%; 0.007)            | 47 (45.2%; <0.001)       |
| Congestive Heart Failure | 178 (19.9%)         | 14 (50%; <0.001)             | 56 (53.9%; <0.001)       |
| Atrial Fibrillation      | 116 (13.0%)         | 24 (85.7%; <0.001)           | 76 (73.1%; <0.001)       |
| Hypertension             | 649 (72.6%)         | 25 (89.3%; 0.08)             | 88 (84.6%; 0.009)        |
| Diabetes                 | 335 (37.5%)         | 15 (53.6%; 0.12)             | 47 (45.2%; 0.14)         |
| Chronic Kidney Disease   | 194 (21.7%)         | 6 (21.4%; 1)                 | 35 (33.7%; 0.009)        |
| Cancer                   | 195 (21.8%)         | 7 (25%; 0.81)                | 30 (28.9%; 0.108)        |
| Gastric Bleed            | 99 (11.1%)          | 4 (14.3%; 0.55)              | 19 (18.3%; 0.04)         |
| Liver Disease            | 79 (8.8%)           | 5 (17.9%; 0.17)              | 8 (7.7%; 0.85)           |

## Diagnoses

- All diagnoses found through ICD10 search in patient encounter and problem list diagnoses. No date or active status exclusions were placed on these diagnoses. Diagnoses may be present from old encounters.
  - CAD: ICD10 codes: I25\*, I05\*, I06\*, I07\*, I08\*, I09\*
  - CHF: ICD10 codes: I50\*, Z86.79\*, I11.0\*, I13.0\*, I13.2\*
  - AFib: ICD10 codes: I48\*
  - Hypertension: ICD10 codes: I10\*, I11\*, I12\*, I13\*, I15\*
  - Diabetes: ICD10 codes: E08\*, E09\*, E10\*, E11\*, E13\*
  - CKD: ICD10 codes: N18\*
  - Cancer: ICD10 Codes: C\*, D0\*, Z85\*
  - Gastric Bleed: ICD10 Codes: K92.2\*, Z87.19\*
  - Liver Disease: ICD10 codes: K7\*, Z87.19\*

## Identifying confounders

- We first wanted to identify potential confounding variables. Specifically variables that were potentially associated with both Anticoagulant use and mortality
- To do this we fit a logistic regression on anticoagulant use including Age, Race/Ethnicity, BMI, Gender, and all Diagnosis variables
  - Coefficients: (Note: White/Caucasian was taken as the reference category for Race/Ethnicity)

| variable                                     | Estimate | Std. Error | z value | p value |
|----------------------------------------------|----------|------------|---------|---------|
| (Intercept)                                  | -4.80    | 1.27       | -3.79   | < 0.001 |
| Age                                          | 0.00     | 0.01       | 0.24    | 0.808   |
| Patient.GenderMale                           | 0.44     | 0.24       | 1.86    | 0.063   |
| BMI                                          | 0.03     | 0.02       | 1.97    | 0.049   |
| Race_and_EthHispanic or Latino               | -0.51    | 0.41       | -1.24   | 0.214   |
| Race_and_EthBlack or African American        | 0.20     | 0.31       | 0.63    | 0.526   |
| Race_and_EthOther/Unknown                    | -0.04    | 0.67       | -0.06   | 0.955   |
| Race_and_EthAsian                            | -0.99    | 1.18       | -0.84   | 0.399   |
| Race_and_EthAmerican Indian or Alaska Native | -10.18   | 535.41     | -0.02   | 0.985   |
| DX_CADY                                      | 0.41     | 0.27       | 1.54    | 0.123   |
| DX_CHFY                                      | 0.51     | 0.26       | 1.95    | 0.051   |
| DX_AfibY                                     | 2.90     | 0.26       | 11.07   | < 0.001 |
| DX_HypertensionY                             | 0.08     | 0.34       | 0.23    | 0.822   |
| DX_DiabetesY                                 | 0.32     | 0.25       | 1.27    | 0.204   |
| DX_CKDY                                      | -0.59    | 0.28       | -2.10   | 0.036   |

|                  |       |      |       |       |
|------------------|-------|------|-------|-------|
| DX_CancerY       | 0.05  | 0.27 | 0.20  | 0.844 |
| DX_Gastro_BleedY | 0.07  | 0.33 | 0.22  | 0.829 |
| DX_LiverY        | -0.37 | 0.41 | -0.92 | 0.358 |

After considering these adjusted associations as well as unadjusted associations, we decided to include the following variables in the analysis

- Age, Gender, Race/Ethnicity, CAD, CHF, Afib, and CKD

Evaluating anticoagulant use and mortality

- We used a multivariable logistic regression to evaluate anticoagulant use and mortality, including all identified potential confounders

**Propensity Score development:**

Propensity scores were developed using a multivariable gradient boosting machine (GBM) model on variables identified as having association with both treatment and outcome likelihood. Specifically Patient Age, BMI, Gender, Race, Ethnicity, and history of Coronary Artery Disease, Congestive Heart Failure, Atrial Fibrillation, Hypertension, and Chronic Kidney Disease. Probabilities from this model were mean-stabilized and inverted to be used as inverse probabilities weights in the primary multivariable logistic regression models[citation: <https://pubmed.ncbi.nlm.nih.gov/20822250/>] . This process was repeated for both the DOAC and Warfarin groups separately. Propensity score models were evaluated for standardized effect size balance and overall fit. The DOAC propensity score model had a C-statistic of 0.92 and all but one variable was found to have a standardized bias above 0.25 (Race category other. standardized bias: 0.26). The warfarin propensity score model also had a C-statistic of 0.92, though the covariates were found to be less well balanced with six variables having residual bias over 0.25. These were Age (0.44), Race: Other (0.48), Ethnicity:Hispanic (0.58), Ethnicity: Non-hispanic(0.51), History of Atrial Fibrillation:No (0.29) and History of Atrial Fibrillation:Yes (0.29). These variables were included in the final multivariable logistic regression models in order to control for these residual differences between comparison groups.

**Patient Mortality (crude):**

|          | Non-Survival | Survival    |
|----------|--------------|-------------|
| DOAC     | 15 (14.4%)   | 89 (85.6%)  |
| Warfarin | 9 (32.1%)    | 19 (67.9%)  |
| Control  | 213 (23.8%)  | 681 (76.2%) |

**DOAC Only:**

Crude OR estimate-- OR: 0.54 (95%CI: 0.29 – 0.92), p val = 0.03

Table 2 – Outcomes of multivariable logistic regression comparing DOAC versus control group for all-cause 21 day mortality after inverse propensity weighting.

|                            | OR   | OR 2.5% | OR 97.5% | p value |
|----------------------------|------|---------|----------|---------|
| DOAC vs Control            | 0.44 | 0.20    | 0.90     | 0.033   |
| Age (per 10 years)         | 1.88 | 1.68    | 2.09     | <0.001  |
| log(BMI)                   | 2.77 | 1.31    | 5.93     | 0.008   |
| Gender: Male               | 1.87 | 1.33    | 2.64     | <0.001  |
| Race: Black                | 0.78 | 0.50    | 1.21     | 0.280   |
| Race: Unknown/Other        | 0.67 | 0.32    | 1.35     | 0.267   |
| Ethnicity: Hispanic/Latinx | 0.92 | 0.43    | 1.92     | 0.821   |
| Ethnicity: Unknown/Other   | 0.82 | 0.16    | 2.98     | 0.780   |
| Coronary Artery Disease    | 0.97 | 0.63    | 1.47     | 0.875   |
| Congestive Heart Failure   | 1.49 | 0.98    | 2.27     | 0.062   |
| Atrial Fibrillation        | 1.49 | 0.99    | 2.24     | 0.057   |
| Hypertension               | 0.98 | 0.64    | 1.50     | 0.910   |
| Chronic Kidney Disease     | 1.21 | 0.82    | 1.80     | 0.336   |

**Warfarin Only:**

Crude OR estimate -- OR: 1.51 (0.64-3.31). p val = 0.31

Table 3 – Outcomes of multivariable logistic regression comparing Warfarin versus control group for all-cause 21 day mortality after inverse propensity weighting.

|                            | OR   | OR 2.5% | OR 97.5% | p value |
|----------------------------|------|---------|----------|---------|
| Warfarin vs Control        | 0.29 | 0.02    | 1.62     | 0.237   |
| Age (per 10 years)         | 1.87 | 1.67    | 2.09     | <0.001  |
| log(BMI)                   | 2.55 | 1.20    | 5.48     | 0.016   |
| Gender: Male               | 1.96 | 1.38    | 2.81     | 0.000   |
| Race: Black                | 0.84 | 0.53    | 1.31     | 0.448   |
| Race: Unknown/Other        | 0.65 | 0.31    | 1.32     | 0.245   |
| Ethnicity: Hispanic/Latinx | 1.01 | 0.47    | 2.14     | 0.980   |
| Ethnicity: Unknown/Other   | 0.88 | 0.18    | 3.17     | 0.863   |
| Coronary Artery Disease    | 0.97 | 0.62    | 1.51     | 0.905   |
| Congestive Heart Failure   | 1.65 | 1.06    | 2.55     | 0.026   |
| Atrial Fibrillation        | 1.54 | 0.98    | 2.39     | 0.056   |
| Hypertension               | 0.94 | 0.62    | 1.45     | 0.779   |
| Chronic Kidney Disease     | 0.96 | 0.63    | 1.46     | 0.852   |

**Bleeding Events:**

Bleeding events for all groups were captured by ICD-10 encounter diagnosis search. Between group statistical comparisons were carried out using fisher's exact test.

|          | Any Bleeding Event | No Bleeding Event | P val (vs Control) |
|----------|--------------------|-------------------|--------------------|
| Warfarin | 2 (7.1%)           | 26                | 0.65               |
| DOAC     | 6 (5.8%)           | 98                | 0.67               |
| Control  | 46 (5.1%)          | 848               | NA                 |
